# Supplementary material for: A Proof-of-Concept for Epigenetic Therapy of Tissue Fibrosis: Inhibition of Liver Fibrosis Progression by 3-Deazaneplanocin A
Source: PubMed Central journal article supplement (PMC5363305; doi:10.1016/j.ymthe.2016.10.004), 2017-01-04
Supplement: mmc1.pdf [file mmc1.pdf]

## **Supplemental Information**

### **A Proof-of-Concept for Epigenetic Therapy of Tissue Fibrosis: Inhibition of Liver Fibrosis Progression by 3-Deazaneplanocin A**

**Müjdat Zeybel, Saimir Luli, Laura Sabater, Timothy Hardy, Fiona Oakley, Jack Leslie, Agata Page, Eva Moran Salvador, Victoria Sharkey, Hidekazu Tsukamoto, David C.K. Chu, Uma Sharan Singh, Mirco Ponzoni, Patrizia Perri, Daniela Di Paolo, Edgar J. Mendivil, Jelena Mann, and Derek A. Mann**

Supplementary material for manuscript “A Proof-of-Concept for Epigenetic Therapy of Chronic Liver Disease: Inhibition of Fibrosis Progression by 3-Deazanoplanocin A (DZNep)”

| Compound. No. | Structure |
|---------------|-----------|
| 1.            |           |
| 2.            |           |
| 3.            |           |
| 4.            |           |
| 5.            |           |
| 6.            |           |
| 7.            |           |
| 8.            |           |
| 9.            |           |

Supplementary Figure 1 – Chemical structures of compounds used in Figure 1.

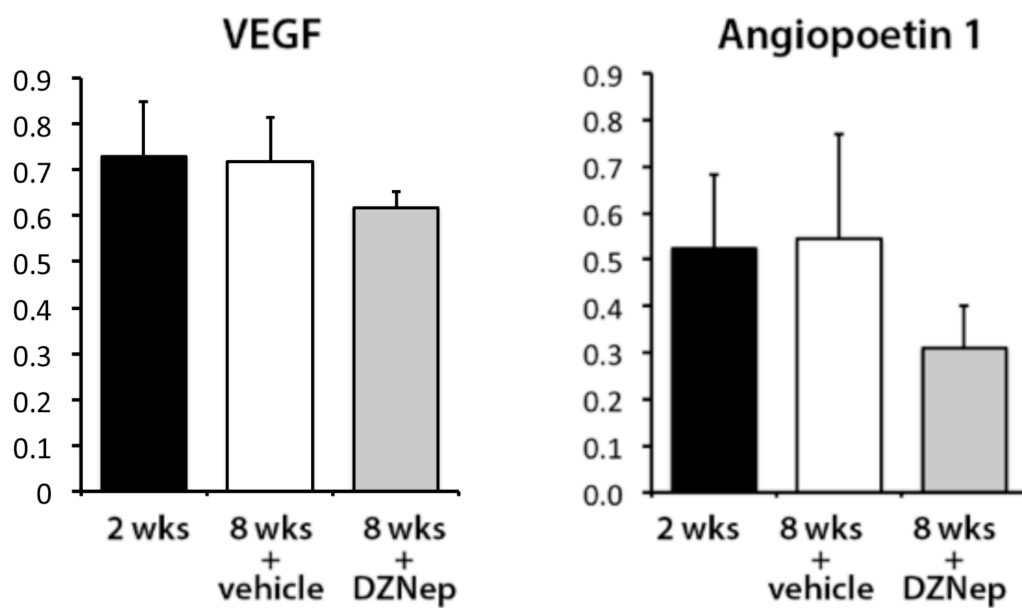

Supplementary Figure 2 -Angiopoietin I and VEGF expression in livers of mice treated with vehicle or DZNep in chronic CCl<sub>4</sub> model of liver fibrosis.

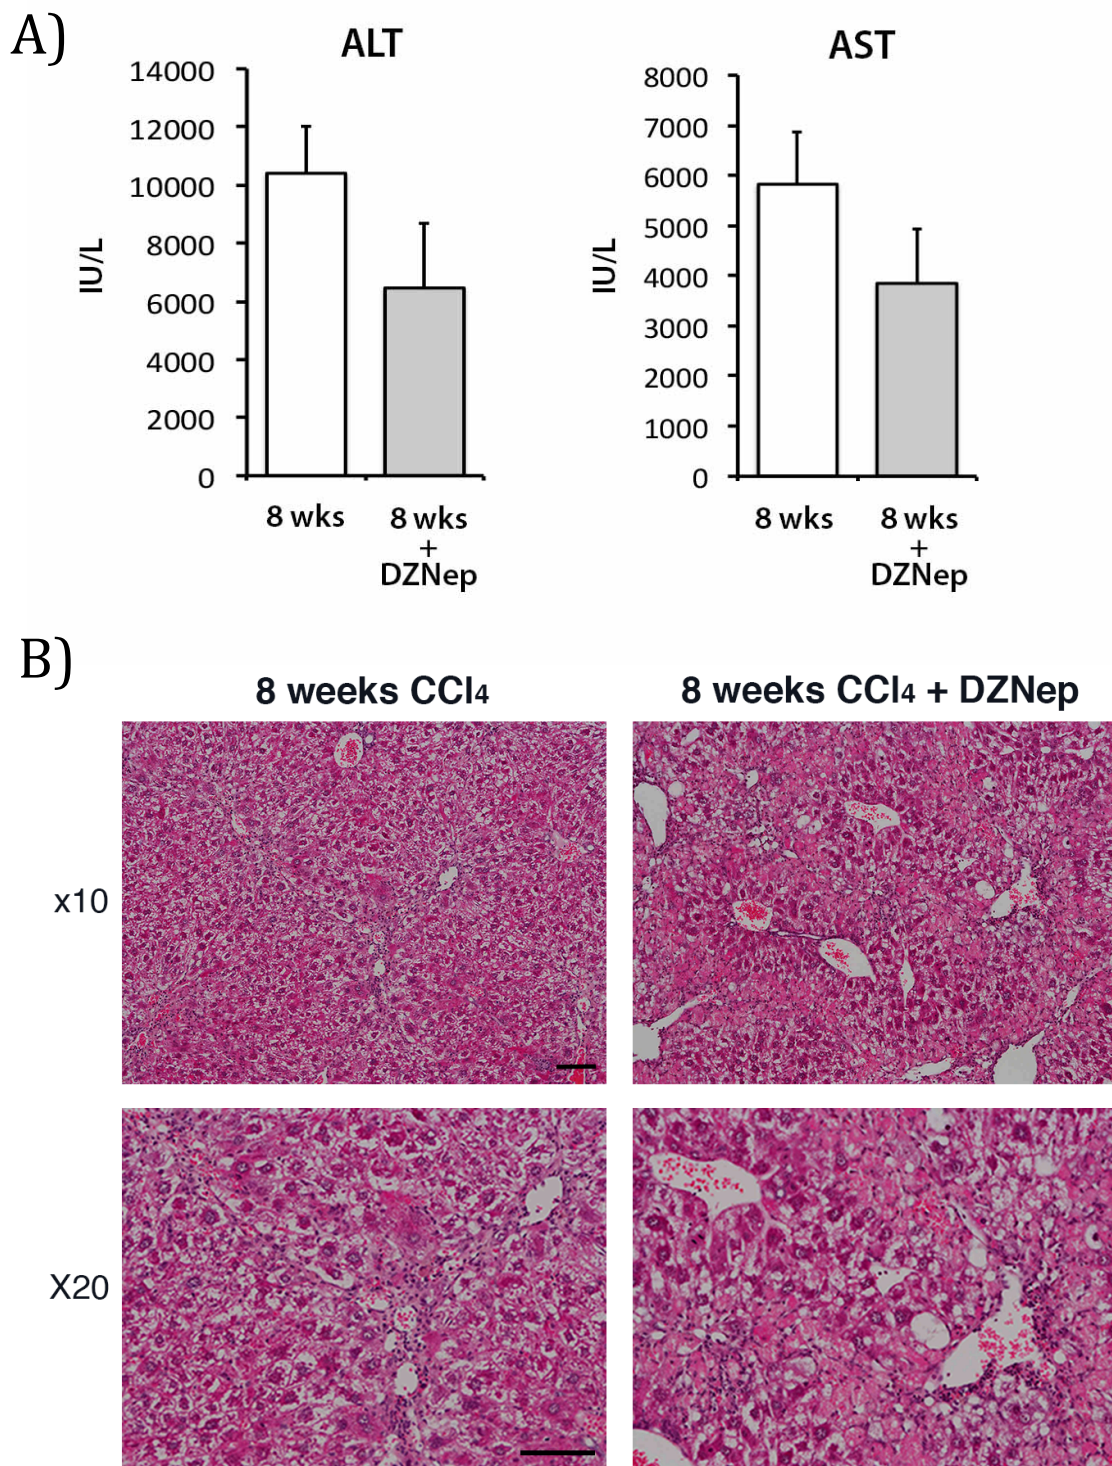

Supplementary Figure 3 – A) ALT and AST values for mice treated with DZNep in chronic CCl<sub>4</sub> model of liver fibrosis. B) Representative Hematoxylin and Eosin stained slides of 8 week CCl<sub>4</sub> injured livers, with or without DZNep (or vehicle)

in bottom panels. Amplification is 10X in top two pictures and 20X in the bottom ones. Scale bar – 100mm.

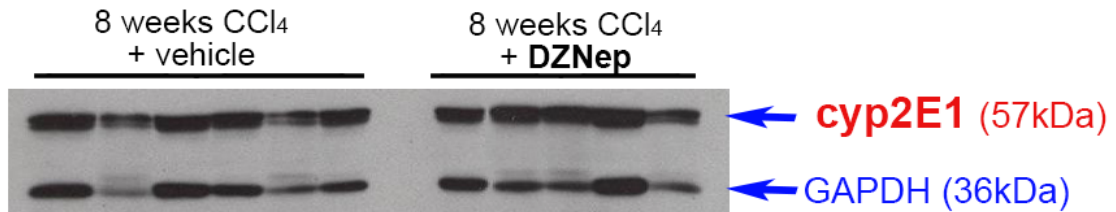

Supplementary Figure 4- Western blot for cyp2E1 expression in livers of animals receiving chronic CCl<sub>4</sub> with vehicle or DZNep treatment

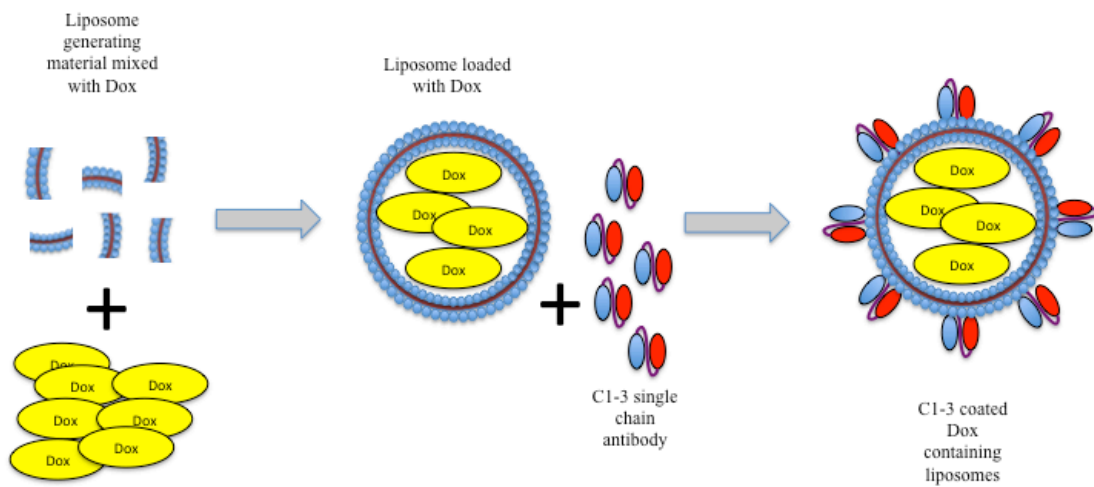

Supplementary Figure 5- Schematic of the C1-3 coated doxorubicin containing liposomes

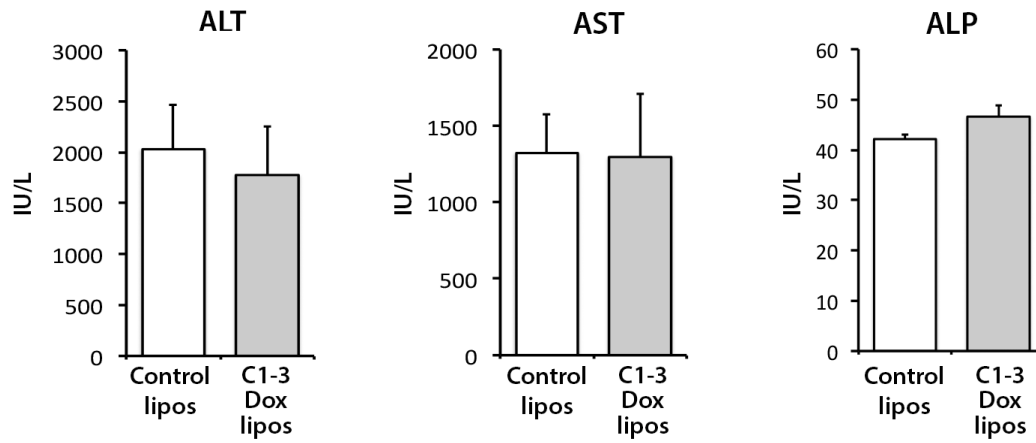

Supplementary Figure 6- ALT, AST and ALP values for mice treated with C1-3/empty liposomes (control liposomes) or C1-3/doxorubicine containing liposomes in acute CCl<sub>4</sub> liver injury

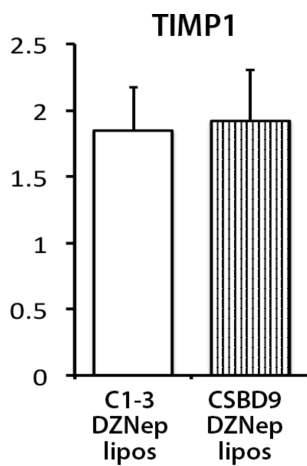

Supplementary Figure 7- TIMP1 expression in livers of mice treated with C1-3/DZNep liposomes or CSBD9/DZNep liposomes in chronic CCl<sub>4</sub> model of liver fibrosis

**Table 2- Genes upregulated in DZNep treated livers (Sorted via fold change)**

| <b>Gene name</b>                                                                                  | <b>Fold change</b> |
|---------------------------------------------------------------------------------------------------|--------------------|
| G6pc, glucose-6-phosphatase, catalytic, 3370255                                                   | 4.4897             |
| Hamp2, hepcidin antimicrobial peptide 2, 7330482                                                  | 3.9385             |
| Cyp4a14, cytochrome P450, family 4, subfamily a, polypeptide 14, 1940273                          | 3.3069             |
| Thrsp, thyroid hormone responsive SPOT14 homolog (Rattus), 6580403                                | 3.2759             |
| Cyp8b1, cytochrome P450, family 8, subfamily b, polypeptide 1, 4900341                            | 3.1924             |
| Cyp7a1, cytochrome P450, family 7, subfamily a, polypeptide 1, 4880333                            | 3.1865             |
| Cyp2c37, cytochrome P450, family 2. subfamily c, polypeptide 37, 4480437                          | 3.0023             |
| Cyp2c50, cytochrome P450, family 2, subfamily c, polypeptide 50, 290437                           | 2.9735             |
| Cyp2c37, cytochrome P450, family 2. subfamily c, polypeptide 37, 1240592                          | 2.9628             |
| Car3, carbonic anhydrase 3, 1450242                                                               | 2.8145             |
| 2810007J24Rik, RIKEN cDNA 2810007J24 gene, 7610520                                                | 2.738              |
| Acss2, acyl-CoA synthetase short-chain family member 2, 4570333                                   | 2.6234             |
| Inmt, indolethylamine N-methyltransferase, 2360050                                                | 2.6051             |
| Bhmt, betaine-homocysteine methyltransferase, 2480039                                             | 2.5697             |
| Upp2, uridine phosphorylase 2, 2070372                                                            | 2.53               |
| Aqp8, aquaporin 8, 2470717                                                                        | 2.4786             |
| Serpina6, serine (or cysteine) peptidase inhibitor, clade A, member 6, 6660403                    | 2.4424             |
| Cyp2c29, cytochrome P450, family 2, subfamily c, polypeptide 29, 4730403                          | 2.3787             |
| Upp2, uridine phosphorylase 2, 3520382                                                            | 2.364              |
| Slc25a25, solute carrier family 25 (mitochondrial carrier, phosphate carrier), member 25, 3440070 | 2.2409             |
| Chrna4, cholinergic receptor, nicotinic, alpha polypeptide 4, 2260082                             | 2.2151             |
| Aqp8, aquaporin 8, 7160093                                                                        | 2.1861             |
| Uhrf1, ubiquitin-like, containing PHD and RING finger domains, 1, 4560397                         | 2.1823             |
| Upp2, uridine phosphorylase 2, 1410170                                                            | 2.0986             |
| Raet1b, retinoic acid early transcript beta, 50025                                                | 2.0245             |
| Cyp1a2, cytochrome P450, family 1, subfamily a, polypeptide 2, 5260367                            | 1.9878             |
| Slc2a2, solute carrier family 2 (facilitated glucose transporter), member 2, 2680593              | 1.9873             |
| Cyp1a2, cytochrome P450, family 1, subfamily a, polypeptide 2, 1050079                            | 1.9858             |
| Raet1b, retinoic acid early transcript beta, 10541                                                | 1.9722             |
| Gstm2, glutathione S-transferase, mu 2, 2690025                                                   | 1.9349             |
| Chrna4, cholinergic receptor, nicotinic, alpha polypeptide 4, 2070482                             | 1.9326             |

|                                                                                                                      |        |
|----------------------------------------------------------------------------------------------------------------------|--------|
| Cyp4a31, cytochrome P450, family 4, subfamily a, polypeptide 31, 60364                                               | 1.8999 |
| Gstm2, glutathione S-transferase, mu 2, 7510072                                                                      | 1.8703 |
| Elov16, ELOVL family member 6, elongation of long chain fatty acids (yeast), 670608                                  | 1.8645 |
| Cyp4f14, cytochrome P450, family 4, subfamily f, polypeptide 14, 4640041                                             | 1.8626 |
| Igfbp2, insulin-like growth factor binding protein 2, 580364                                                         | 1.861  |
| Aacs, acetoacetyl-CoA synthetase, 7650468                                                                            | 1.8587 |
| Mcm6, minichromosome maintenance deficient 6 (MIS5 homolog, S. pombe) (S. cerevisiae), 3990243                       | 1.8521 |
| Upp2, uridine phosphorylase 2, 6040400                                                                               | 1.803  |
| Mcm5, minichromosome maintenance deficient 5, cell division cycle 46 (S. cerevisiae), 6220270                        | 1.7868 |
| Rnf125, ring finger protein 125, 2320176                                                                             | 1.7865 |
| Aldh1a1, aldehyde dehydrogenase family 1, subfamily A1, 5810470                                                      | 1.7734 |
| Gstm2, glutathione S-transferase, mu 2, 730025                                                                       | 1.7644 |
| Gstt3, glutathione S-transferase, theta 3, 2350324                                                                   | 1.7562 |
| Hpd, 4-hydroxyphenylpyruvic acid dioxygenase, 2360528                                                                | 1.749  |
| Pygl, liver glycogen phosphorylase, 1030142                                                                          | 1.7436 |
| Agxt, alanine-glyoxylate aminotransferase, 6180408                                                                   | 1.7402 |
| Psm3, proteasome (prosome, macropain) subunit, alpha type 3; 3' UTR, 5900047                                         | 1.7292 |
| Rrm2, ribonucleotide reductase M2, 3440725                                                                           | 1.7222 |
| Lss, lanosterol synthase, 5890553                                                                                    | 1.7121 |
| Sucnr1, succinate receptor 1, 1190148                                                                                | 1.7105 |
| Mcm6, minichromosome maintenance deficient 6 (MIS5 homolog, S. pombe) (S. cerevisiae), 3290437                       | 1.7096 |
| Khk, ketohexokinase, 20010                                                                                           | 1.7084 |
| Khk, ketohexokinase, 6840014                                                                                         | 1.7051 |
| Psen2, presenilin 2, 990682                                                                                          | 1.7015 |
| Acly, ATP citrate lyase, 7050274                                                                                     | 1.6998 |
| Igfbp2, insulin-like growth factor binding protein 2, 1230240                                                        | 1.6886 |
| Fdps, farnesyl diphosphate synthetase, 5290671                                                                       | 1.6818 |
| Dmgdh, dimethylglycine dehydrogenase precursor, 2450750                                                              | 1.6815 |
| Cyp2c70, cytochrome P450, family 2, subfamily c, polypeptide 70, 4280722                                             | 1.6791 |
| Pah, phenylalanine hydroxylase, 1980328                                                                              | 1.6775 |
| Ttc39c, tetratricopeptide repeat domain 39C, 7330228                                                                 | 1.6676 |
| Slc47a1, solute carrier family 47, member 1, 6520022                                                                 | 1.6615 |
| Scd1, stearoyl-Coenzyme A desaturase 1, 3890274                                                                      | 1.6552 |
| Paqr9, progesterin and adipoQ receptor family member IX, 650731                                                      | 1.6489 |
| Ces2g, carboxylesterase 2G, 7100458                                                                                  | 1.6421 |
| LOC100040592, PREDICTED: Mus musculus similar to Hmgcs1 protein, transcript variant 1 (LOC100040592), mRNA., 6940521 | 1.641  |



|                                                                                                         |        |
|---------------------------------------------------------------------------------------------------------|--------|
| Paox, polyamine oxidase (exo-N4-amino), 3140102                                                         | 1.6408 |
| Insig1, insulin induced gene 1, 10309                                                                   | 1.6386 |
| Gstt1, glutathione S-transferase, theta 1, 430564                                                       | 1.6366 |
| Dhcr7, 7-dehydrocholesterol reductase, 4280112                                                          | 1.633  |
| Nudt7, nudix (nucleoside diphosphate linked moiety X)-type motif 7, 5420685                             | 1.6288 |
| Tk1, thymidine kinase 1, 7400142                                                                        | 1.6261 |
| Cyp2c67, cytochrome P450, family 2, subfamily c, polypeptide 67, 1170600                                | 1.6232 |
| Aldh1l1, aldehyde dehydrogenase 1 family, member L1, 380754                                             | 1.6209 |
| Dhcr24, 24-dehydrocholesterol reductase, 4250228                                                        | 1.6131 |
| Idi1, Mus musculus isopentenyl-diphosphate delta isomerase (Idi1), transcript variant 2, mRNA., 3140768 | 1.6109 |
| Slco1b2, solute carrier organic anion transporter family, member 1b2, 4570053                           | 1.6097 |
| Dak, dihydroxyacetone kinase 2 homolog (yeast), 1660739                                                 | 1.6067 |
| Bbox1, butyrobetaine (gamma), 2-oxoglutarate dioxygenase 1 (gamma-butyrobetaine hydroxylase), 450072    | 1.604  |
| Slc22a1, solute carrier family 22 (organic cation transporter), member 1, 4250100                       | 1.6039 |
| Hsd17b6, hydroxysteroid (17-beta) dehydrogenase 6, 4060364                                              | 1.6017 |
| LOC100044204, PREDICTED: Mus musculus hypothetical protein LOC100044204 (LOC100044204), mRNA., 3830048  | 1.5969 |
| Mcm6, minichromosome maintenance deficient 6 (MIS5 homolog, S. pombe) (S. cerevisiae), 270379           | 1.5969 |
| Pmvk, phosphomevalonate kinase, 670025                                                                  | 1.5963 |
| Apol9b, apolipoprotein L 9b, 4280093                                                                    | 1.5951 |
| Ugt1a6a, UDP glucuronosyltransferase 1 family, polypeptide A6A, 1170349                                 | 1.5777 |
| Rdh11, retinol dehydrogenase 11, 650411                                                                 | 1.5716 |
| Gulo, gulonolactone (L-) oxidase, 6650674                                                               | 1.571  |
| Idh2, isocitrate dehydrogenase 2 (NADP+), mitochondrial, 2510390                                        | 1.559  |
| Hist1h2ad, histone cluster 1, H2ad, 3520717                                                             | 1.5586 |
| Hist1h2ap, histone cluster 1, H2ap, 6510253                                                             | 1.5585 |
| Ndr2, N-myc downstream regulated gene 2, 1450601                                                        | 1.5584 |
| Adh4, alcohol dehydrogenase 4 (class II), pi polypeptide, 6840193                                       | 1.5574 |
| Pygl, liver glycogen phosphorylase, 3310333                                                             | 1.5572 |
| Gsta3, glutathione S-transferase, alpha 3, 5550075                                                      | 1.5566 |
| Ddt, D-dopachrome tautomerase, 1990731                                                                  | 1.5565 |
| Kynu, kynureninase (L-kynurenine hydrolase), 520138                                                     | 1.5528 |
| Cml1, camello-like 1, 7380671                                                                           | 1.5504 |
| Mcm4, minichromosome maintenance deficient 4 homolog (S. cerevisiae), 2320368                           | 1.5482 |
| Abcb11, ATP-binding cassette, sub-family B (MDR/TAP), member 11,                                        | 1.5433 |

|                                                                                                                            |        |
|----------------------------------------------------------------------------------------------------------------------------|--------|
| 6330731                                                                                                                    |        |
| Ces1g, carboxylesterase 1G, 6480397                                                                                        | 1.5428 |
| Dhcr24, NA, 2100162                                                                                                        | 1.5404 |
| Hist1h2an, histone cluster 1, H2an, 4610129                                                                                | 1.5393 |
| Acat2, acetyl-Coenzyme A acetyltransferase 2, 110661                                                                       | 1.5386 |
| LOC100047200, PREDICTED: Mus musculus similar to T-box 3 protein (LOC100047200), mRNA., 6510162                            | 1.538  |
| Cyp3a25, cytochrome P450, family 3, subfamily a, polypeptide 25, 7570017                                                   | 1.5379 |
| Figl1, fidgetin-like 1, 670500                                                                                             | 1.5364 |
| Dhdh, dihydrodiol dehydrogenase (dimeric), 3060066                                                                         | 1.536  |
| Aox3, aldehyde oxidase 3, 3190646                                                                                          | 1.5337 |
| Cdbl, carboxymethylenebutenolidase-like (Pseudomonas), 5910072                                                             | 1.5336 |
| Cyp2b9, cytochrome P450, family 2, subfamily b, polypeptide 9, 1940504                                                     | 1.5287 |
| Ly6d, lymphocyte antigen 6 complex, locus D, 2510646                                                                       | 1.5262 |
| Paqr9, progesterin and adipoQ receptor family member IX, 3440739                                                           | 1.5238 |
| Hist1h2af, histone cluster 1, H2af, 4250711                                                                                | 1.5222 |
| Tcf19, transcription factor 19, 6330725                                                                                    | 1.5213 |
| Nat8, N-acetyltransferase 8 (GCN5-related, putative), 3170255                                                              | 1.5207 |
| E2f1, E2F transcription factor 1, 60369                                                                                    | 1.5139 |
| Cisd1, CDGSH iron sulfur domain 1, 110576                                                                                  | 1.513  |
| Hsd3b7, hydroxy-delta-5-steroid dehydrogenase, 3 beta- and steroid delta-isomerase 7, 5890494                              | 1.5122 |
| Slc2a2, solute carrier family 2 (facilitated glucose transporter), member 2, 630487                                        | 1.5117 |
| Ddc, dopa decarboxylase, 610601                                                                                            | 1.5084 |
| Slc2a2, solute carrier family 2 (facilitated glucose transporter), member 2, 2760463                                       | 1.5065 |
| Ly6d, lymphocyte antigen 6 complex, locus D, 5560754                                                                       | 1.5031 |
| Aldh1a7, aldehyde dehydrogenase family 1, subfamily A7, 3130288                                                            | 1.5019 |
| Sc4mol, sterol-C4-methyl oxidase-like, 6420253                                                                             | 1.5002 |
| Hist1h2ak, histone cluster 1, H2ak, 3130609                                                                                | 1.4995 |
| Cyp51, cytochrome P450, family 51, 540020                                                                                  | 1.4962 |
| Sc5d, sterol-C5-desaturase (fungal ERG3, delta-5-desaturase) homolog (S. cerevisiae), 4150747                              | 1.4952 |
| Pecr, peroxisomal trans-2-enoyl-CoA reductase, 2260561                                                                     | 1.4937 |
| Rarres2, retinoic acid receptor responder (tazarotene induced) 2, 6060367                                                  | 1.4926 |
| Cyp2e1, cytochrome P450, family 2, subfamily e, polypeptide 1, 6280133                                                     | 1.4923 |
| Rgn, regucalcin, 3440437                                                                                                   | 1.4866 |
| LOC100047937, PREDICTED: Mus musculus similar to Aldehyde dehydrogenase 1 family, member L1 (LOC100047937), mRNA., 4890608 | 1.4863 |
| Rnf125, ring finger protein 125, 4050541                                                                                   | 1.4862 |
| Ces1d, carboxylesterase 1D, 670603                                                                                         | 1.481  |

|                                                                                                                                                      |        |
|------------------------------------------------------------------------------------------------------------------------------------------------------|--------|
| Gamt, guanidinoacetate methyltransferase, 290044                                                                                                     | 1.4792 |
| Mthfd1, methylenetetrahydrofolate dehydrogenase (NADP+ dependent), methenyltetrahydrofolate cyclohydrolase, formyltetrahydrofolate synthase, 7150484 | 1.4787 |
| Afm, afamin, 5890706                                                                                                                                 | 1.4784 |
| Ttc39c, tetratricopeptide repeat domain 39C, 4670022                                                                                                 | 1.4757 |
| Rfc4, replication factor C (activator 1) 4, 3940458                                                                                                  | 1.4749 |
| Tlcd2, TLC domain containing 2, 5900592                                                                                                              | 1.4718 |
| Apoa5, apolipoprotein A-V, 7380762                                                                                                                   | 1.4717 |
| Cdt1, chromatin licensing and DNA replication factor 1, 1050706                                                                                      | 1.4713 |
| Insig1, insulin induced gene 1, 5310343                                                                                                              | 1.4662 |
| Dcxr, dicarbonyl L-xylulose reductase, 3140274                                                                                                       | 1.4643 |
| 1100001G20Rik, RIKEN cDNA 1100001G20 gene, 1300707                                                                                                   | 1.4623 |
| Cyp2c55, cytochrome P450, family 2, subfamily c, polypeptide 55, 2360427                                                                             | 1.4618 |
| Fen1, flap structure specific endonuclease 1, 3460037                                                                                                | 1.4616 |
| Ephx2, epoxide hydrolase 2, cytoplasmic, 3520491                                                                                                     | 1.4603 |
| Cyp2f2, cytochrome P450, family 2, subfamily f, polypeptide 2, 6040689                                                                               | 1.4596 |
| Ebpl, emopamil binding protein-like, 110630                                                                                                          | 1.4572 |
| Sult1a1, sulfotransferase family 1A, phenol-preferring, member 1, 4070215                                                                            | 1.4568 |
| Tecr, trans-2,3-enoyl-CoA reductase, 60220                                                                                                           | 1.4561 |
| Tecr, trans-2,3-enoyl-CoA reductase, 6620603                                                                                                         | 1.4551 |
| D0H4S114, DNA segment, human D4S114, 7040243                                                                                                         | 1.4548 |
| Cdc6, cell division cycle 6 homolog ( <i>S. cerevisiae</i> ), 2030026                                                                                | 1.4542 |
| Tmie, transmembrane inner ear, 5390632                                                                                                               | 1.4522 |
| 4931406C07Rik, RIKEN cDNA 4931406C07 gene, 630576                                                                                                    | 1.4501 |
| Lig1, ligase I, DNA, ATP-dependent, 3060767                                                                                                          | 1.4481 |
| Abat, 4-aminobutyrate aminotransferase, 6020181                                                                                                      | 1.4472 |
| Haa0, 3-hydroxyanthranilate 3,4-dioxygenase, 1740164                                                                                                 | 1.4452 |
| LOC668837, PREDICTED: Mus musculus similar to ATP synthase, H+ transporting, mitochondrial F0 complex, subunit G (LOC668837), misc RNA., 2690097     | 1.4445 |
| Paox, polyamine oxidase (exo-N4-amino), 4120470                                                                                                      | 1.4445 |
| Sec14l2, SEC14-like 2 ( <i>S. cerevisiae</i> ), 1260075                                                                                              | 1.4416 |
| Spp2, secreted phosphoprotein 2, 4860068                                                                                                             | 1.438  |
| Mrap, melanocortin 2 receptor accessory protein, 5870487                                                                                             | 1.4328 |
| Olfml1, olfactomedin-like 1, 4780020                                                                                                                 | 1.4327 |
| Nrn1, neuritin 1, 5050471                                                                                                                            | 1.4321 |
| Gstm4, glutathione S-transferase, mu 4, 2320228                                                                                                      | 1.4312 |
| Pank1, pantothenate kinase 1, 6290411                                                                                                                | 1.4311 |
| Spc24, SPC24, NDC80 kinetochore complex component, homolog ( <i>S. cerevisiae</i> ), 5340398                                                         | 1.4245 |
| Rrm2, ribonucleotide reductase M2, 5560646                                                                                                           | 1.4228 |

|                                                                                                       |        |
|-------------------------------------------------------------------------------------------------------|--------|
| Apon, apolipoprotein N, 7400376                                                                       | 1.421  |
| Tmem86b, transmembrane protein 86B, 6250184                                                           | 1.4204 |
| Hist1h2ah, histone cluster 1, H2ah, 1470341                                                           | 1.4176 |
| Tdo2, tryptophan 2,3-dioxygenase, 4180187                                                             | 1.4163 |
| Tecr, trans-2,3-enoyl-CoA reductase, 5900333                                                          | 1.4162 |
| Pon1, paraoxonase 1, 4390398                                                                          | 1.4152 |
| Baat, bile acid-Coenzyme A: amino acid N-acyltransferase, 2510674                                     | 1.4148 |
| Nsdhl, NAD(P) dependent steroid dehydrogenase-like, 2650653                                           | 1.4139 |
| Vkorc1, vitamin K epoxide reductase complex, subunit 1, 7650435                                       | 1.4119 |
| Selenbp2, selenium binding protein 2, 4920725                                                         | 1.4108 |
| Slco1b2, solute carrier organic anion transporter family, member 1b2, 1410035                         | 1.4094 |
| Rpa1, replication protein A1, 1340671                                                                 | 1.4085 |
| Atp5a1, ATP synthase, H <sup>+</sup> transporting, mitochondrial F1 complex, alpha subunit 1, 6020746 | 1.4073 |
| Dhcr24, 24-dehydrocholesterol reductase, 6370681                                                      | 1.4071 |
| Ebpl, emopamil binding protein-like, 5810722                                                          | 1.4071 |
| Ccl9, chemokine (C-C motif) ligand 9, 7050538                                                         | 1.4043 |
| Sord, sorbitol dehydrogenase, 5720014                                                                 | 1.4043 |
| Fam73b, family with sequence similarity 73, member B, 1170537                                         | 1.4037 |
| Aldh1b1, aldehyde dehydrogenase 1 family, member B1, 2650154                                          | 1.4029 |
| Bhmt2, betaine-homocysteine methyltransferase 2, 610576                                               | 1.401  |
| Dhdh, dihydrodiol dehydrogenase (dimeric), 830195                                                     | 1.4003 |
| Hsd17b7, hydroxysteroid (17-beta) dehydrogenase 7, 1070097                                            | 1.4001 |
| Fahd1, fumarylacetoacetate hydrolase domain containing 1, 4120692                                     | 1.3999 |
| Sgk2, serum/glucocorticoid regulated kinase 2, 3520519                                                | 1.3999 |
| Gchfr, GTP cyclohydrolase I feedback regulator, 1340711                                               | 1.3989 |
| Slc38a3, solute carrier family 38, member 3, 6100154                                                  | 1.3958 |
| Reln, reelin, 7610484                                                                                 | 1.3955 |
| Tcea3, transcription elongation factor A (SII), 3, 2650372                                            | 1.395  |
| Ebp, phenylalkylamine Ca <sup>2+</sup> antagonist (emopamil) binding protein, 1990112                 | 1.3942 |
| Cyp27a1, cytochrome P450, family 27, subfamily a, polypeptide 1, 2940170                              | 1.393  |
| Sephs2, selenophosphate synthetase 2, 1770707                                                         | 1.3923 |
| Rbp4, retinol binding protein 4, plasma, 5420240                                                      | 1.3914 |
| 5730469M10Rik, RIKEN cDNA 5730469M10 gene, 3180386                                                    | 1.3905 |
| 0610007P14Rik, RIKEN cDNA 0610007P14 gene, 1230730                                                    | 1.3881 |
| Klk1b4, kallikrein 1-related peptidase b4, 1090333                                                    | 1.3867 |
| Slc25a44, solute carrier family 25, member 44, 5550243                                                | 1.3866 |
| Hpgd, hydroxyprostaglandin dehydrogenase 15 (NAD), 2450343                                            | 1.3863 |
| Slc38a4, solute carrier family 38, member 4, 5340386                                                  | 1.386  |
| Lpcat3, lysophosphatidylcholine acyltransferase 3, 2680703                                            | 1.384  |

|                                                                                               |        |
|-----------------------------------------------------------------------------------------------|--------|
| Ddah1, dimethylarginine dimethylaminohydrolase 1, 2060592                                     | 1.3834 |
| Akr1c14, aldo-keto reductase family 1, member C14, 1690632                                    | 1.3833 |
| Nfic, nuclear factor I/C, 3840059                                                             | 1.3818 |
| Mvd, mevalonate (diphospho) decarboxylase, 2100097                                            | 1.3818 |
| Entpd5, ectonucleoside triphosphate diphosphohydrolase 5, 2320292                             | 1.3803 |
| Cyp3a11, cytochrome P450, family 3, subfamily a, polypeptide 11, 7320431                      | 1.3801 |
| Cyb5r3, cytochrome b5 reductase 3, 840309                                                     | 1.3786 |
| Amy1, amylase 1, salivary, 4850164                                                            | 1.3775 |
| Cyp17a1, cytochrome P450, family 17, subfamily a, polypeptide 1, 670653                       | 1.3773 |
| Hacl1, 2-hydroxyacyl-CoA lyase 1, 7210615                                                     | 1.3765 |
| Acot3, acyl-CoA thioesterase 3, 2230600                                                       | 1.3761 |
| Nit2, nitrilase family, member 2, 1090136                                                     | 1.3759 |
| Ugt2a3, UDP glucuronosyltransferase 2 family, polypeptide A3, 3710040                         | 1.3757 |
| Gstk1, glutathione S-transferase kappa 1, 5890487                                             | 1.3709 |
| Mgst3, microsomal glutathione S-transferase 3, 4210619                                        | 1.3701 |
| Ces1e, carboxylesterase 1E, 4040259                                                           | 1.3686 |
| Ttpa, tocopherol (alpha) transfer protein, 7000431                                            | 1.3652 |
| Hyi, hydroxypyruvate isomerase homolog (E. coli), 4830576                                     | 1.3651 |
| Nsdhl, NAD(P) dependent steroid dehydrogenase-like, 4830717                                   | 1.3642 |
| Nsdhl, NAD(P) dependent steroid dehydrogenase-like, 990338                                    | 1.3569 |
| Cat, catalase, 4760356                                                                        | 1.3537 |
| Gsta3, glutathione S-transferase, alpha 3, 3780193                                            | 1.352  |
| Otc, ornithine transcarbamylase, 4890731                                                      | 1.3499 |
| Cox7b, cytochrome c oxidase subunit VIIb, 940692                                              | 1.3489 |
| Gpld1, glycosylphosphatidylinositol specific phospholipase D1, 6940064                        | 1.3474 |
| Nsdhl, NAD(P) dependent steroid dehydrogenase-like, 5820603                                   | 1.3469 |
| Serpinc1, serine (or cysteine) peptidase inhibitor, clade C (antithrombin), member 1, 1690128 | 1.3458 |
| Pcyl1a, phosphate cytidyltransferase 1, choline, alpha isoform, 150475                        | 1.3454 |
| Acsm3, acyl-CoA synthetase medium-chain family member 3, 3170270                              | 1.3451 |
| Stard4, StAR-related lipid transfer (START) domain containing 4, 4210288                      | 1.344  |
| Snurf, SNRPN upstream reading frame, 3130246                                                  | 1.3427 |
| Insig1, insulin induced gene 1, 4920369                                                       | 1.3405 |
| Pemt, phosphatidylethanolamine N-methyltransferase, 620349                                    | 1.3257 |
| Ces2e, carboxylesterase 2E, 780333                                                            | 1.3239 |
| Pmpcb, peptidase (mitochondrial processing) beta, 450544                                      | 1.3196 |
| Hsd11b1, hydroxysteroid 11-beta dehydrogenase 1, 2340301                                      | 1.3103 |

**Table 3- Genes downregulated in DZNep treated livers (Sorted via fold change)**

| Gene name                                                                                                        | Fold change |
|------------------------------------------------------------------------------------------------------------------|-------------|
| Hbb-b1, hemoglobin, beta adult major chain, 670403                                                               | 0.4458      |
| Slpi, secretory leukocyte peptidase inhibitor, 2810487                                                           | 0.4501      |
| Trib3, tribbles homolog 3 (Drosophila), 4280056                                                                  | 0.4549      |
| Hba-a1, hemoglobin alpha, adult chain 1, 2000398                                                                 | 0.4659      |
| Mup21, major urinary protein 21, 3440110                                                                         | 0.4864      |
| Egr1, early growth response 1, 6620079                                                                           | 0.4913      |
| Chac1, ChaC, cation transport regulator-like 1 (E. coli), 540300                                                 | 0.4955      |
| Ctgf, connective tissue growth factor, 4010082                                                                   | 0.503       |
| Acta2, actin, alpha 2, smooth muscle, aorta, 430068                                                              | 0.5044      |
| Creld2, cysteine-rich with EGF-like domains 2, 4860079                                                           | 0.519       |
| Tnfrsf12a, tumor necrosis factor receptor superfamily, member 12a, 1770541                                       | 0.5239      |
| Gadd45a, growth arrest and DNA-damage-inducible 45 alpha, 580609                                                 | 0.536       |
| Gadd45a, growth arrest and DNA-damage-inducible 45 alpha, 3890332                                                | 0.5424      |
| Creld2, cysteine-rich with EGF-like domains 2, 290685                                                            | 0.545       |
| Hspb1, heat shock protein 1, 5670722                                                                             | 0.5471      |
| Emp1, epithelial membrane protein 1, 7160167                                                                     | 0.5534      |
| Hspa8, heat shock protein 8, 2030593                                                                             | 0.571       |
| Ddit3, DNA-damage inducible transcript 3, 1500497                                                                | 0.573       |
| Syvn1, synovial apoptosis inhibitor 1, synoviolin, 10674                                                         | 0.5743      |
| Xlr4a, X-linked lymphocyte-regulated 4A, 5870021                                                                 | 0.5867      |
| Herpud1, homocysteine-inducible, endoplasmic reticulum stress-inducible, ubiquitin-like domain member 1, 1050619 | 0.5935      |
| Herpud1, homocysteine-inducible, endoplasmic reticulum stress-inducible, ubiquitin-like domain member 1, 50129   | 0.5947      |
| Gtpbp2, GTP binding protein 2, 3850142                                                                           | 0.6031      |
| Cxcl9, chemokine (C-X-C motif) ligand 9, 10598                                                                   | 0.6049      |
| Npy, neuropeptide Y, 160494                                                                                      | 0.6069      |
| Plin2, perilipin 2, 5670164                                                                                      | 0.6082      |
| Dnajc12, DnaJ (Hsp40) homolog, subfamily C, member 12, 1230441                                                   | 0.6091      |
| Acta2, actin, alpha 2, smooth muscle, aorta, 2140255                                                             | 0.6118      |
| Pdlim7, PDZ and LIM domain 7, 6550609                                                                            | 0.6165      |
| Acta2, actin, alpha 2, smooth muscle, aorta, 1850022                                                             | 0.6281      |
| Cyp2a5, cytochrome P450, family 2, subfamily a, polypeptide 5, 840114                                            | 0.633       |
| Oat, ornithine aminotransferase, 4560309                                                                         | 0.6417      |
| Osgin1, oxidative stress induced growth inhibitor 1, 430037                                                      | 0.6426      |
| Acot1, acyl-CoA thioesterase 1, 450356                                                                           | 0.6447      |

|                                                                                                     |        |
|-----------------------------------------------------------------------------------------------------|--------|
| Tes, testis derived transcript, 7550121                                                             | 0.6448 |
| Saa3, serum amyloid A 3, 6400719                                                                    | 0.6456 |
| Cd14, CD14 antigen, 6020674                                                                         | 0.6486 |
| Cxcl1, chemokine (C-X-C motif) ligand 1, 3610082                                                    | 0.6494 |
| Sprr1b, small proline-rich protein 1B, 6450228                                                      | 0.6503 |
| Zfand2a, zinc finger, AN1-type domain 2A, 1400170                                                   | 0.6525 |
| Tfrc, transferrin receptor, 620110                                                                  | 0.6552 |
| Slc38a2, solute carrier family 38, member 2, 4640008                                                | 0.6559 |
| Ch25h, cholesterol 25-hydroxylase, 1510349                                                          | 0.6583 |
| S100a8, S100 calcium binding protein A8 (calgranulin A), 1190546                                    | 0.661  |
| Cnot3, CCR4-NOT transcription complex, subunit 3; exon 12, 130519                                   | 0.6617 |
| Cd9, CD9 antigen, 3990674                                                                           | 0.6626 |
| Ms4a6d, membrane-spanning 4-domains, subfamily A, member 6D, 3180025                                | 0.6634 |
| Ctsj, cathepsin J, 1170041                                                                          | 0.6639 |
| Mt1, metallothionein 1, 5220279                                                                     | 0.6644 |
| Nupr1, nuclear protein 1, 1240424                                                                   | 0.6655 |
| Lgmn, legumain, 1690719                                                                             | 0.6699 |
| Cyp2a5, cytochrome P450, family 2, subfamily a, polypeptide 5, 6350333                              | 0.6701 |
| Hsph1, heat shock 105kDa/110kDa protein 1, 3290270                                                  | 0.6703 |
| Rhbdf1, rhomboid family 1 (Drosophila), 3840598                                                     | 0.6715 |
| Tfrc, transferrin receptor, 1780524                                                                 | 0.6718 |
| Foxq1, forkhead box Q1, 1850487                                                                     | 0.6731 |
| Tmsb10, thymosin, beta 10, 5130273                                                                  | 0.6738 |
| P2rx4, purinergic receptor P2X, ligand-gated ion channel 4, 2030484                                 | 0.6746 |
| Acta2, actin, alpha 2, smooth muscle, aorta, 3130136                                                | 0.677  |
| Arpc1b, actin related protein 2/3 complex, subunit 1B, 3120576                                      | 0.6783 |
| Cd63, CD63 antigen, 7050487                                                                         | 0.6799 |
| 1500012F01Rik, RIKEN cDNA 1500012F01 gene, 540138                                                   | 0.6808 |
| Cyp2a5, cytochrome P450, family 2, subfamily a, polypeptide 5, 1500180                              | 0.6821 |
| Tbfg1, transforming growth factor beta regulated gene 1, 1450220                                    | 0.6831 |
| Eef2, eukaryotic translation elongation factor 2, 1690070                                           | 0.685  |
| Sqstm1, sequestosome 1, 4560619                                                                     | 0.6889 |
| Apcs, serum amyloid P-component, 2320170                                                            | 0.6895 |
| Lgals3, lectin, galactose binding, soluble 3, 510474                                                | 0.6919 |
| Nfkbiz, nuclear factor of kappa light polypeptide gene enhancer in B cells inhibitor, zeta, 6650458 | 0.692  |
| Mtap7d1, microtubule-associated protein 7 domain containing 1, 670543                               | 0.6975 |
| Ddit3, DNA-damage inducible transcript 3, 1230605                                                   | 0.6993 |
| Chordc1, cysteine and histidine-rich domain (CHORD)-containing, zinc-binding protein 1, 360725      | 0.7003 |
| Hist1h1c, histone cluster 1, H1c, 50079                                                             | 0.701  |
| Fgf21, fibroblast growth factor 21, 6290743                                                         | 0.7011 |

|                                                                                      |        |
|--------------------------------------------------------------------------------------|--------|
| Uap1l1, UDP-N-acteylglucosamine pyrophosphorylase 1-like 1, 1410113                  | 0.7022 |
| Zyx, zyxin, 4050400                                                                  | 0.7041 |
| S100a9, S100 calcium binding protein A9 (calgranulin B), 1980603                     | 0.705  |
| S100a6, S100 calcium binding protein A6 (calcyclin), 5080326                         | 0.7052 |
| Ddx17, DEAD (Asp-Glu-Ala-Asp) box polypeptide 17, 6180465                            | 0.7066 |
| Wfdc3, WAP four-disulfide core domain 3, 1570370                                     | 0.7067 |
| Srxn1, sulfiredoxin 1 homolog (S. cerevisiae), 2970189                               | 0.707  |
| P2rx4, purinergic receptor P2X, ligand-gated ion channel 4, 3120341                  | 0.7101 |
| Lims2, LIM and senescent cell antigen like domains 2, 3180681                        | 0.7107 |
| Ugt1a6a, UDP glucuronosyltransferase 1 family, polypeptide A6A, 3800446              | 0.7114 |
| Cd63, CD63 antigen, 5090053                                                          | 0.7119 |
| Col23a1, procollagen, type 23, alpha 1; 3' UTR, 2030358                              | 0.7133 |
| Dnajb1, DnaJ (Hsp40) homolog, subfamily B, member 1, 4540020                         | 0.7161 |
| Foxa3, forkhead box A3, 5290376                                                      | 0.7162 |
| Dnttip1, deoxynucleotidyltransferase, terminal, interacting protein 1, 4920072       | 0.7166 |
| Fndc3b, fibronectin type III domain containing 3B, 7160364                           | 0.7176 |
| Vmp1, vacuole membrane protein 1, 5690327                                            | 0.7178 |
| Egfr, epidermal growth factor receptor, 1770292                                      | 0.719  |
| Egfr, epidermal growth factor receptor, 4540382                                      | 0.7194 |
| Tnfrsf22, tumor necrosis factor receptor superfamily, member 22, 430301              | 0.7195 |
| Gm11428, predicted gene 11428, 5360370                                               | 0.7218 |
| Nrbp2, nuclear receptor binding protein 2, 110561                                    | 0.7258 |
| Bag3, BCL2-associated athanogene 3, 6660653                                          | 0.7262 |
| Psat1, phosphoserine aminotransferase 1, 2260010                                     | 0.727  |
| Tmem86a, transmembrane protein 86A, 2750184                                          | 0.7273 |
| Hspa5, heat shock protein 5, 150678                                                  | 0.7277 |
| Atp2a2, ATPase, Ca <sup>++</sup> transporting, cardiac muscle, slow twitch 2, 770349 | 0.731  |
| Rbpms, RNA binding protein gene with multiple splicing, 4050121                      | 0.7318 |
| Rpl23, ribosomal protein L23, 670176                                                 | 0.7396 |
| Tmc7, transmembrane channel-like gene family 7, 5910408                              | 0.7398 |
| Stbd1, starch binding domain 1, 1430129                                              | 0.7403 |
| Timp1, tissue inhibitor of metalloproteinase 1, 4640215                              | 0.7429 |
| Scara5, scavenger receptor class A, member 5 (putative), 160377                      | 0.747  |
| Dbp, D site albumin promoter binding protein, 3180750                                | 0.796  |
